# Supplementary material
Source: PubMed Central journal article supplement (PMC6220217)
Supplement: ajtr0010-3186-f6.pdf [file ajtr0010-3186-f6.pdf]

# MALAT1 promotes relapse BC patients with postoperative fever

## Supplementary Data

Postoperative fever and the short-term recurrence of breast cancer patients. All the enrolled patients completed the follow-up, with a median follow-up of 23 months (range 3-36 months). During the follow-up period, 11 relapse events were observed in 258 breast cancer patients, including 1 case with supra-clavicular lymph node metastasis, 2 cases with bone metastasis, 1 case with liver metastasis, 3 cases with pulmonary pleural metastasis, and 4 cases with multiple organ metastasis. Before the end of follow-up, 3 patients died due to relapse events. When compared with patients without fever after surgery (Non-fever group), those who had postoperative fever (Fever group) experienced more relapse events. Relapse-free survival of the two groups was 97.5% to 90.2% (Figure S1A), respectively. In the univariate survival analysis, we found significantly different PFS between the two groups (Log-rank test,  $P = 0.0149$ , Figure S1B). In the Cox proportional hazards regression analysis, we found that tumor size ( $P = 0.015$ ; RR = 4.42; 95% CI 1.34-14.58) and fever ( $P = 0.043$ ; RR = 3.43; 95% CI 1.04-11.31) were independent prognostic factors for PFS (Table S3).

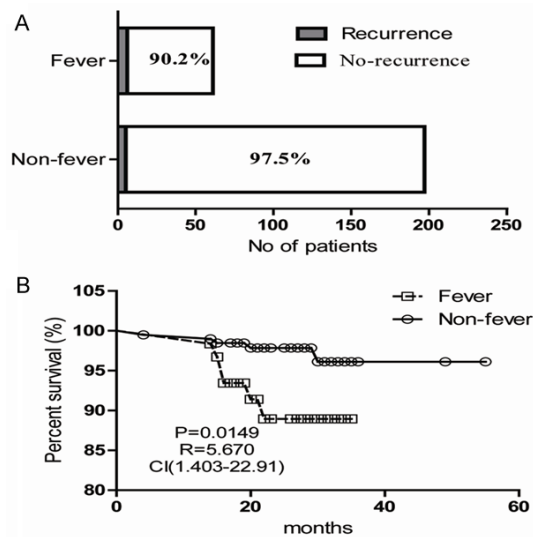

**Figure S1.** Postoperative fever may be an indicator of the short-term recurrence of breast cancer patients. A. Relapse-free survival of the fever group and non-fever group was 97.5% and 90.2%, respectively. B. Kaplan-Meier curve analysis indicated that patients with postoperative fever had poor prognosis compared with patients without postoperative fever (Log-rank test  $P = 0.0149$ ).

**Table S1.** The nucleotide sequences of the targeting MALAT1 and Negative control shScramble

|                |           |                                       |
|----------------|-----------|---------------------------------------|
| Malat1 siRNA-1 | Sense     | CACAGGGAAAGCGAGTGGTTGGTAA             |
|                | Antisense | TTACCAACCACTCGCTTTCCTGTG              |
| Malat1 siRNA-2 | Sense     | GAGGUGUAAAGGGAUUUUAUTT                |
|                | Antisense | AUAAAUCCCUUUACACCUCTT                 |
| Malat1 siRNA-3 | Sense     | GGAAGATAGAAACAAGATATATCTTGTTCCTATCTCC |
|                | Antisense | GGAAGATAGAAACAAGATATATCTTGTTCCTATCTCC |
| NC shScramble  | Sense     | UUCUCCGAACGUGUCACGUTT                 |
|                | Antisense | ACGUGACACGUUCGGAGATT                  |

## MALAT1 promotes relapse BC patients with postoperative fever

**Table S2.** The primers for MMP3 and vimentin

| Gene     | Foward primer (5'→3')    | Reverse primer (5'→3')   |
|----------|--------------------------|--------------------------|
| MMP9     | CAGCCCCTGCTCCTGGCTCTCCTG | ACTCGTCGTCGTCGAAATGGGCAT |
| Vimentin | GACAATGCGTCTCTGGCAGTCTT  | TCCTCCGCCTCCTGCAGGTTCTT  |
| β-actin  | TCATGAAGTGTGACGTGGACATC  | CAGGAGGAGCAATGATCTTGATCT |

**Table S3.** Multivariate Cox regression analysis of prognostic factors for DFS in 258 primary breast cancer patients

| Variable                                  | RR    | 95% CI of RR | P value |
|-------------------------------------------|-------|--------------|---------|
| Age (≤50 vs. >50)                         | 0.567 | 0.157~2.055  | 0.388   |
| Tumor-size (≥5 cm vs. <5 cm)              | 4.420 | 1.340~14.577 | 0.015   |
| Lymph node status (positive vs. Negative) | 2.197 | 0.511~9.441  | 0.290   |
| ER (≥1% vs. <1%)                          | 0.394 | 0.040~3.841  | 0.423   |
| PR (≥1% vs. <1%)                          | 0.683 | 0.062~7.503  | 0.756   |
| HER2 (positive vs. Negative)*             | 2.576 | 0.684~9.702  | 0.162   |
| Ki-67 (<20% vs. ≥20%)                     | 0.316 | 0.074~1.345  | 0.119   |
| Fever (≥38 °C vs. <38 °C)                 | 3.430 | 1.040~11.313 | 0.043   |

\*HER2-positive cancers were defined by either strong membrane staining (3+) observed by IHC or amplification of HER2 confirmed by fluorescence in situ hybridization when immunohisto-chemistry detected moderate (2+) membrane staining.
